# Supplementary material
Source: publisher site journal article supplement (https://www.dovepress.com/article/519729)

Supplementary Table 1 Antibodies and their corresponding fluorescent labels for flow cytometry analysis

| Cell type | Markers | Fluorescent labeling | Clone | Manufacturer | Catalogue Number |
| --- | --- | --- | --- | --- | --- |
| T lymphocytes | CD3 | APC-H7 | SK7 | BD | 560176 |
| T helper cells | CD4 | APC | SK3 | BD | 566915 |
| Cytotoxic T cells | CD8 | PerCP-Cy5.5 | RPA-T8 | BD | 560662 |
| B lymphocytes | CD19 | APC | SJ25C1 | BD | 560117 |
| NK cells | CD56 | PE | MY31 | BD | 556647 |
| lymphocytes | CD45 | V500 | HI30 | BD | 560777 |
|  |  |  |  |  |  |

Supplementary Figure 1.Detailed schematic diagram of flow cytometry analysis


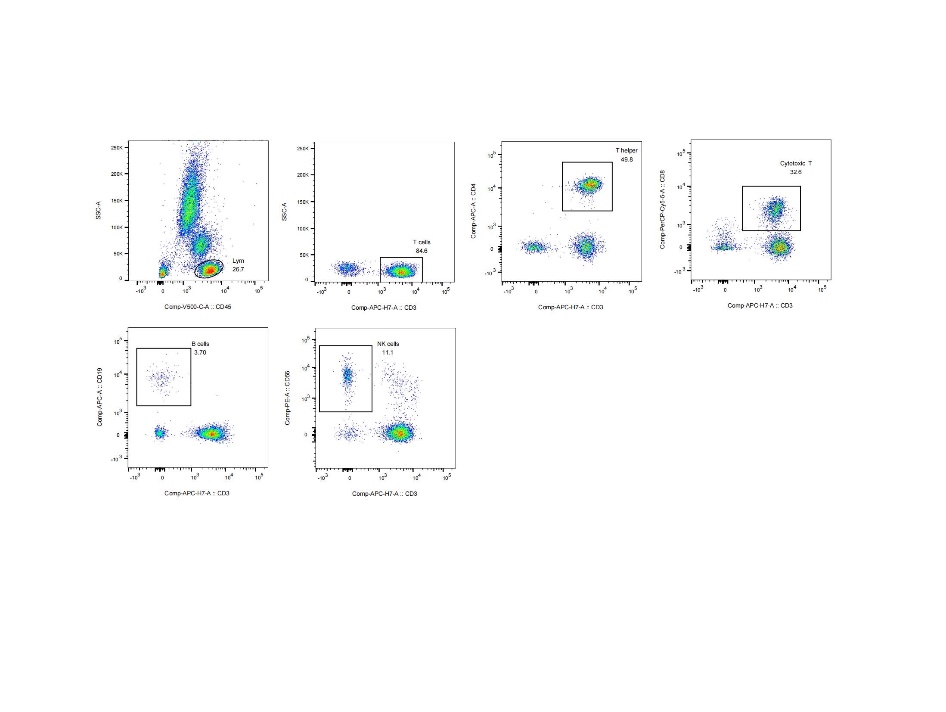

Supplement: Supplementary file 1 [file 519729%20Revised%20Supplementary%20Material.docx]
